# Supplementary figures and images for: Divergent synthesis of dendrimer-like pH-responsive macromolecules through a combination of ATRP and ROP for controlled release of anti-cancer drug
Source: Royal Society of Chemistry journal article supplement (doi:10.1039/c2tb00359g), 2012-11-10

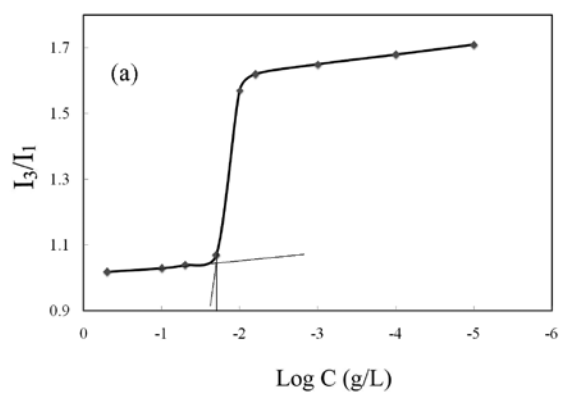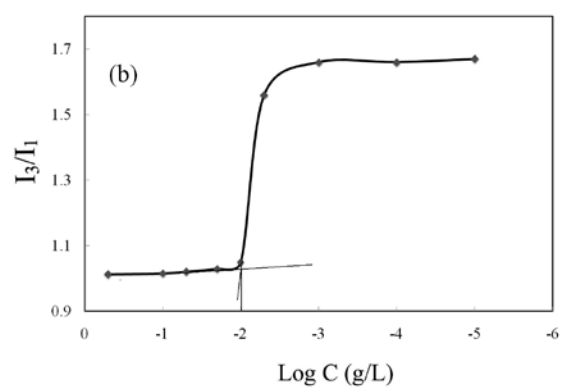

Supplement: c2tb00359g.pdf [file c2tb00359g.pdf]
